# Supplementary material for: Self-assembly of metallosupramolecular rhombi from chiral concave 9,9’-spirobifluorene-derived bis(pyridine) ligands
Source: publisher site journal article supplement (doi:10.3762/bjoc.10.40), 2014-02-18
Supplement: Additional file 1 [file 1860-5397-10-40-S1.pdf]

**Supporting Information**  
**for**  
**Self-assembly of metallosupramolecular rhombi**  
**from chiral concave 9,9'-spirobifluorene-derived**  
**bis(pyridine) ligands**

Rainer Hovorka<sup>1</sup>, Sophie Hytteballe<sup>1</sup>, Torsten Piehler<sup>1</sup>, Georg Meyer-Eppler<sup>1</sup>, Filip Topić<sup>2</sup>, Kari Rissanen<sup>2</sup>, Marianne Engeser<sup>3</sup> and Arne Lützen<sup>1\*</sup>

Address: <sup>1</sup>University of Bonn, Kekulé-Institute of Organic Chemistry and Biochemistry, Gerhard-Domagk-Str. 1, D-53121 Bonn, Germany, <sup>2</sup>Department of Chemistry, Nanoscience Center, University of Jyväskylä, P.O. Box 35, 40014 Jyväskylä, Finland and <sup>3</sup>University of Bonn, Kekulé-Institute of Organic Chemistry and Biochemistry, Gerhard-Domagk-Str. 1, D-53121 Bonn, Germany

Email: Arne Lützen – arne.luetzen@uni-bonn.de

\*Corresponding author

**NMR and ESI mass spectra of compounds 3 and 6 and their metal complexes**

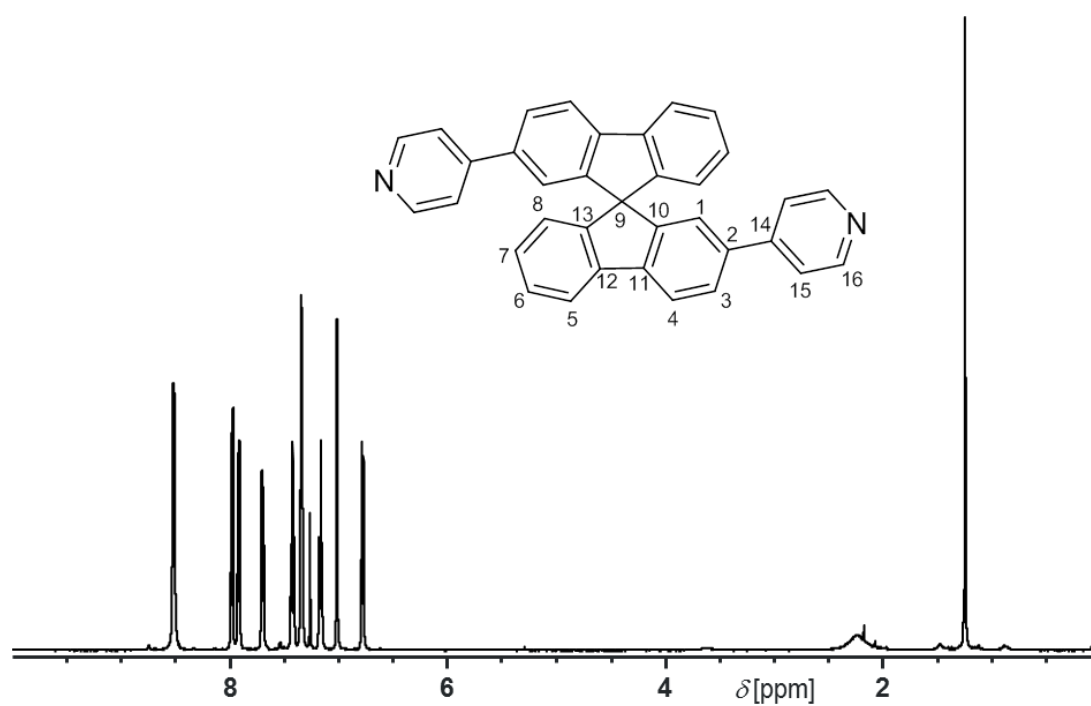

**Figure S1:**  $^1\text{H}$  NMR (400.1 MHz, in  $\text{CDCl}_3$  at 293 K) of **(rac)-3**.

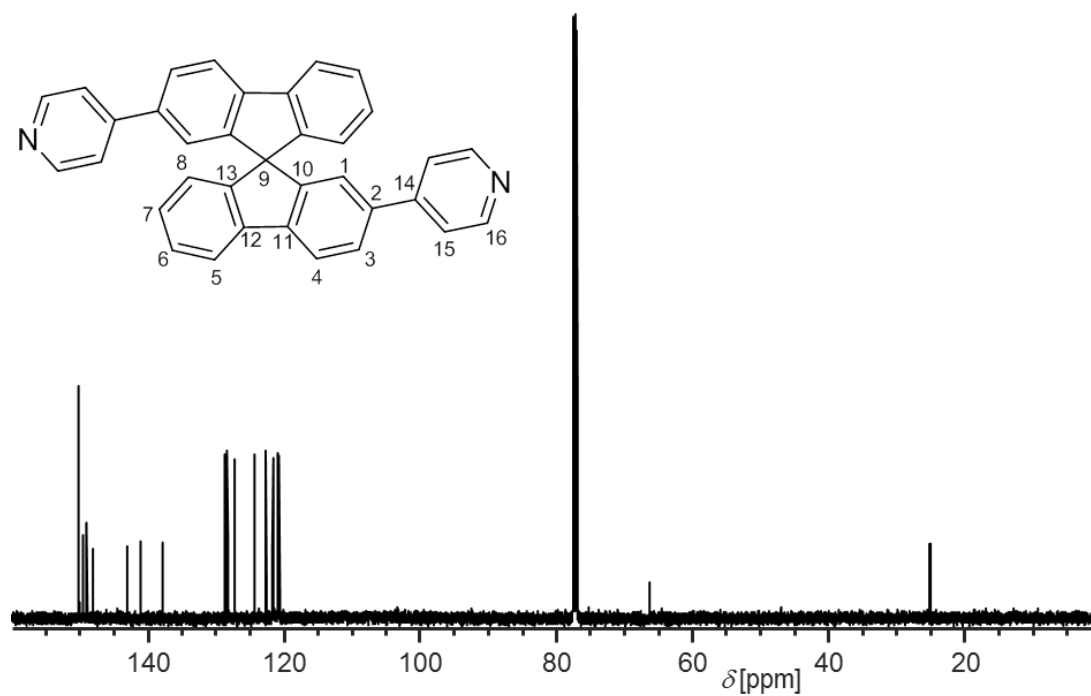

**Figure S2:**  $^{13}\text{C}$  NMR (100.6 MHz, in  $\text{CDCl}_3$  at 293 K) of **(rac)-3**.

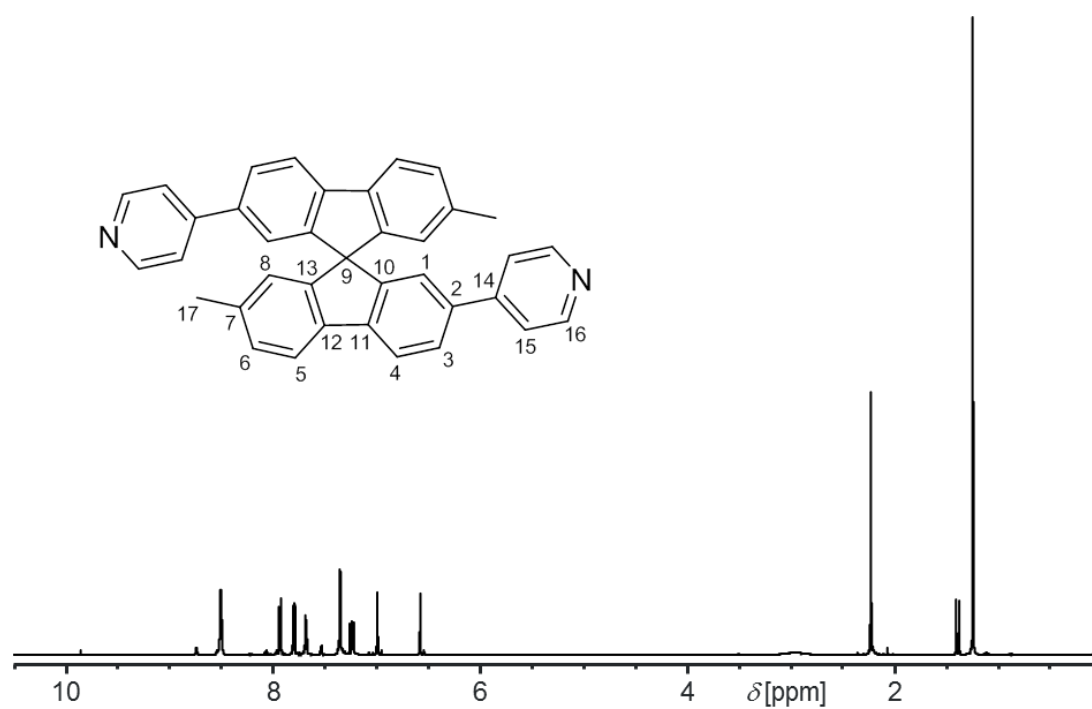

**Figure S3:**  $^1\text{H}$  NMR (400.1 MHz, in  $\text{CDCl}_3$  at 293 K) of (S)-6.

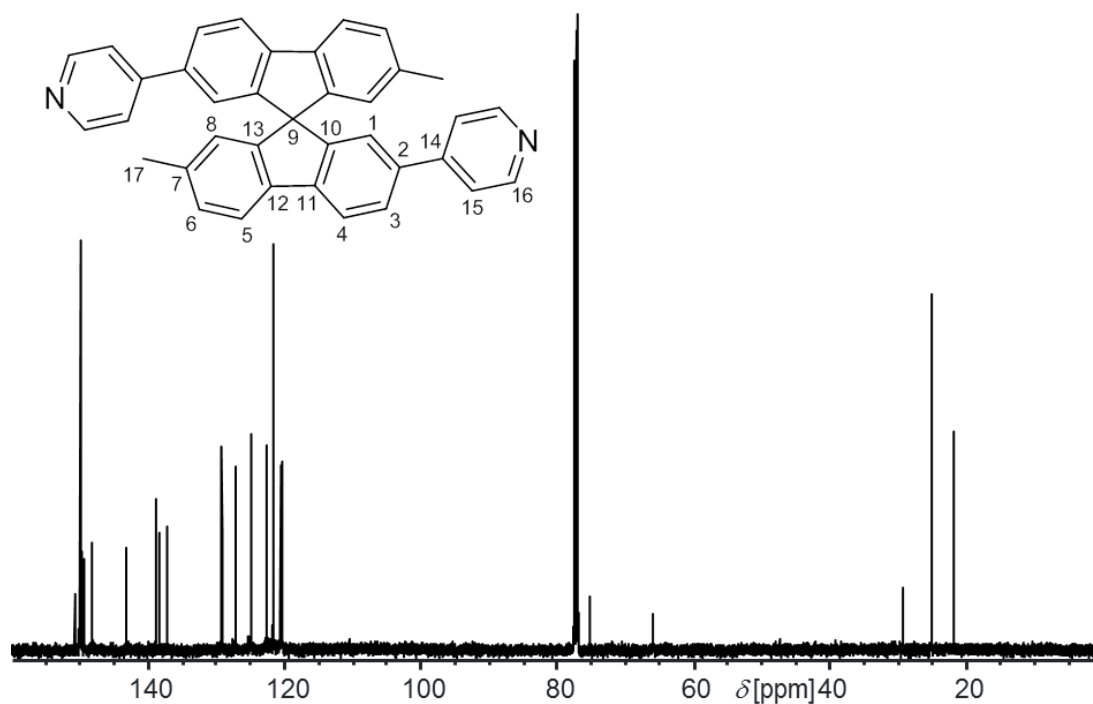

**Figure S4:**  $^{13}\text{C}$  NMR (100.6 MHz, in  $\text{CDCl}_3$  at 293 K) of (S)-6.

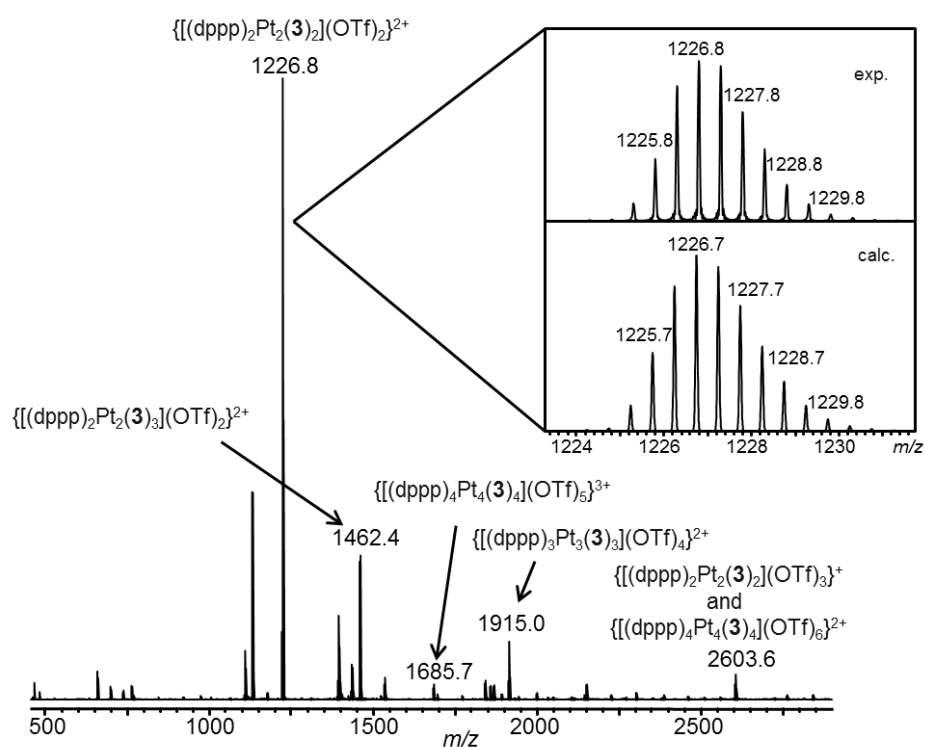

**Figure S5:** ESIMS (positive mode, sprayed from an acetone solution) of  $[(\text{dppp})_2\text{Pt}_2\{(R)\text{-}\mathbf{3}\}_2](\text{OTf})_4$ .

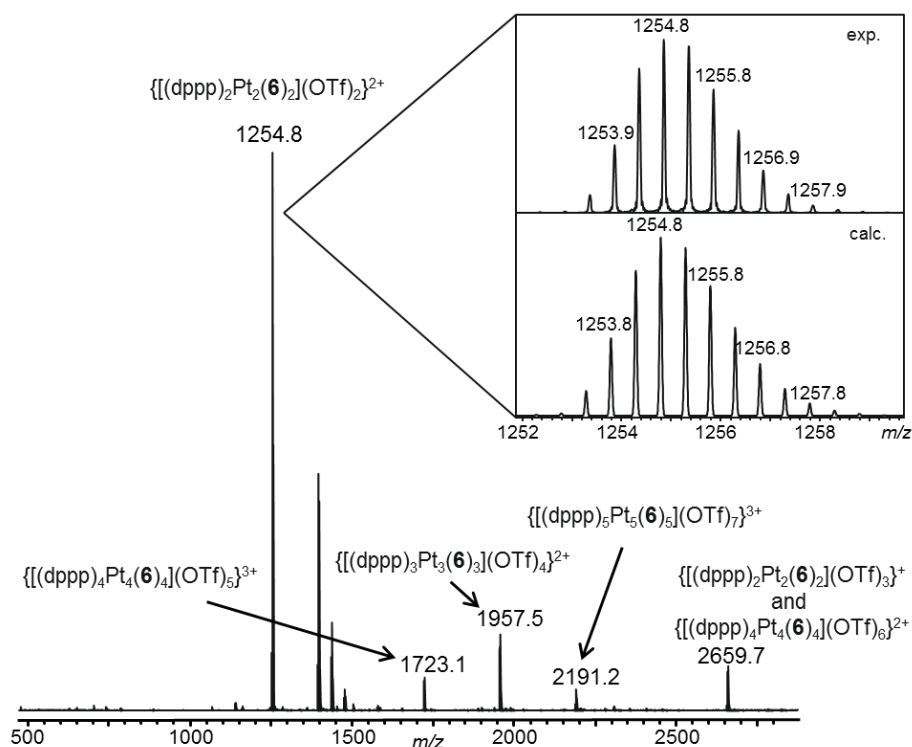

**Figure S6:** ESIMS (positive mode, sprayed from an acetone solution) of  $[(\text{dppp})_2\text{Pt}_2\{(S)\text{-}\mathbf{6}\}_2](\text{OTf})_4$ .

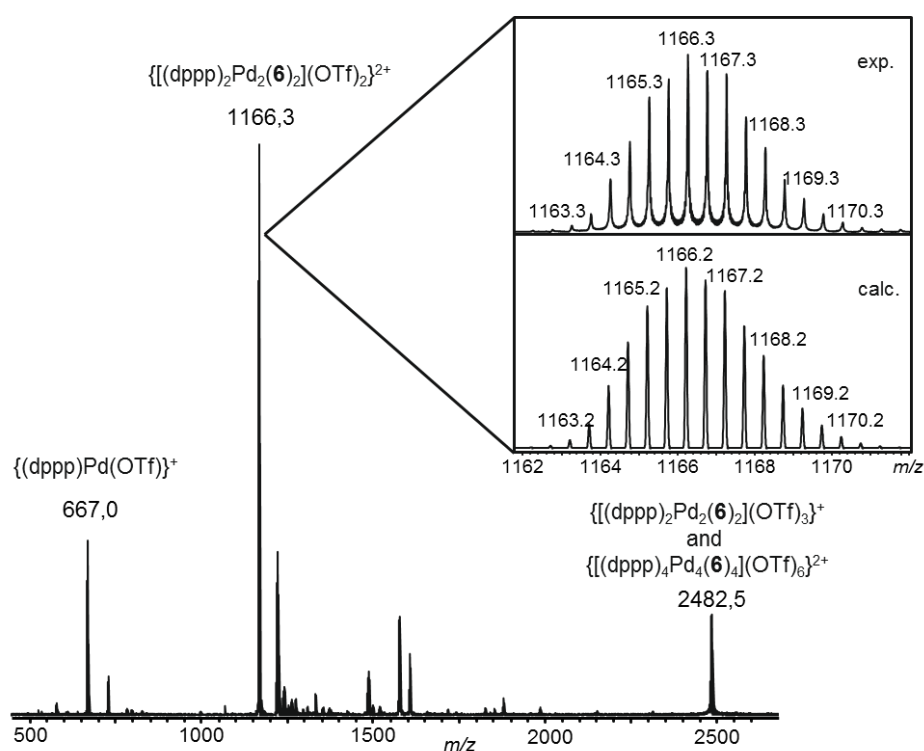

**Figure S7:** ESIMS (positive mode, sprayed from an acetone solution) of  $[(dppp)_2Pd_2\{(S)-\mathbf{6}\}_2](OTf)_4$ .

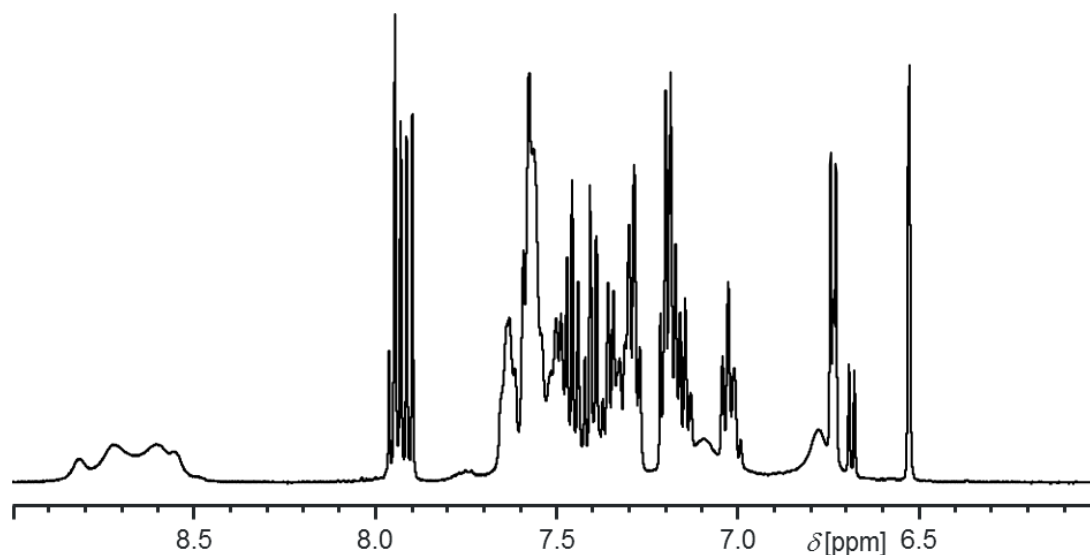

**Figure S8:**  $^1H$  NMR (500.1 MHz, in  $CD_2Cl_2$  at 298 K) of a 1:1 mixture of  $[Pt(dppp)]OTf_2$  and  $(rac)\text{-}\mathbf{3}$ .

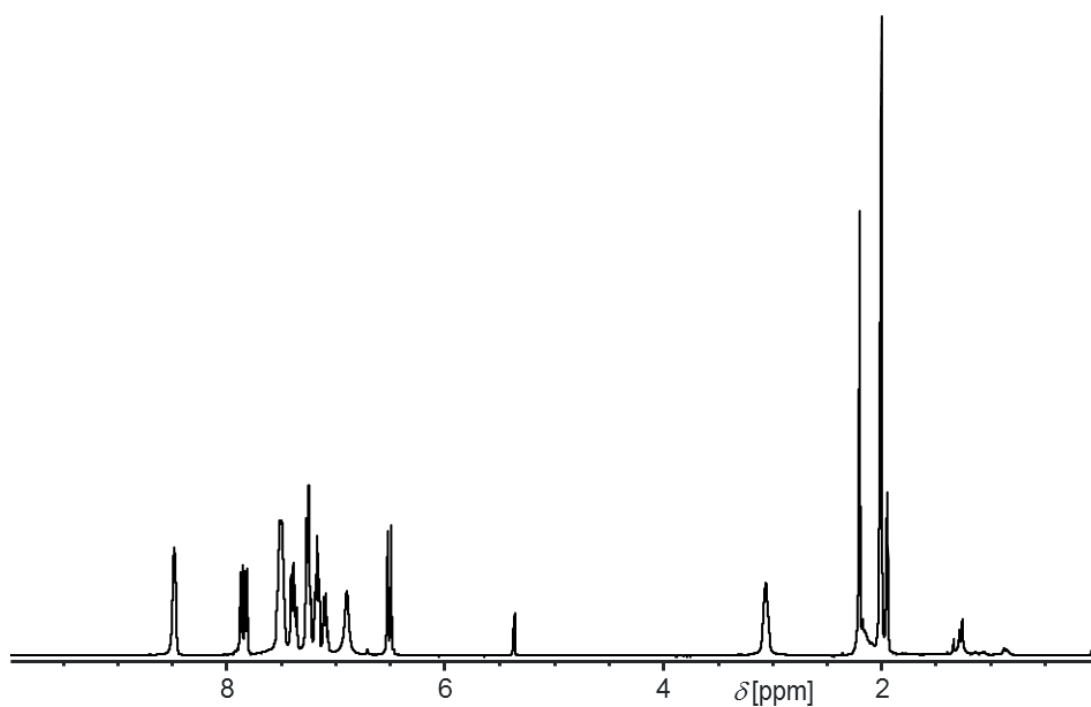

**Figure S9:**  $^1\text{H}$  NMR (500.1 MHz, in  $\text{CD}_2\text{Cl}_2/\text{CD}_3\text{CN}$  3:1 at 298 K) of a 1:1 mixture of  $[\text{Pd}(\text{dppp})]\text{OTf}_2$  and (S)-**6**.

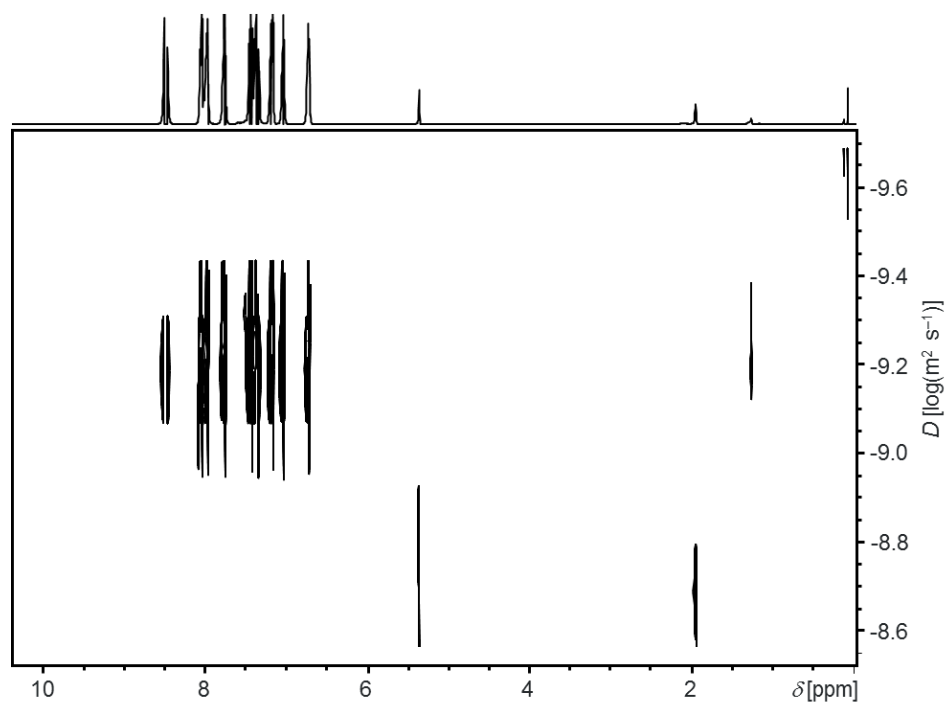

**Figure S10:**  $^1\text{H}$  2D-DOSY-NMR (500.1 MHz, in  $\text{CD}_2\text{Cl}_2/\text{CD}_3\text{CN}$  3:1 at 298 K) of (rac)-**3**.

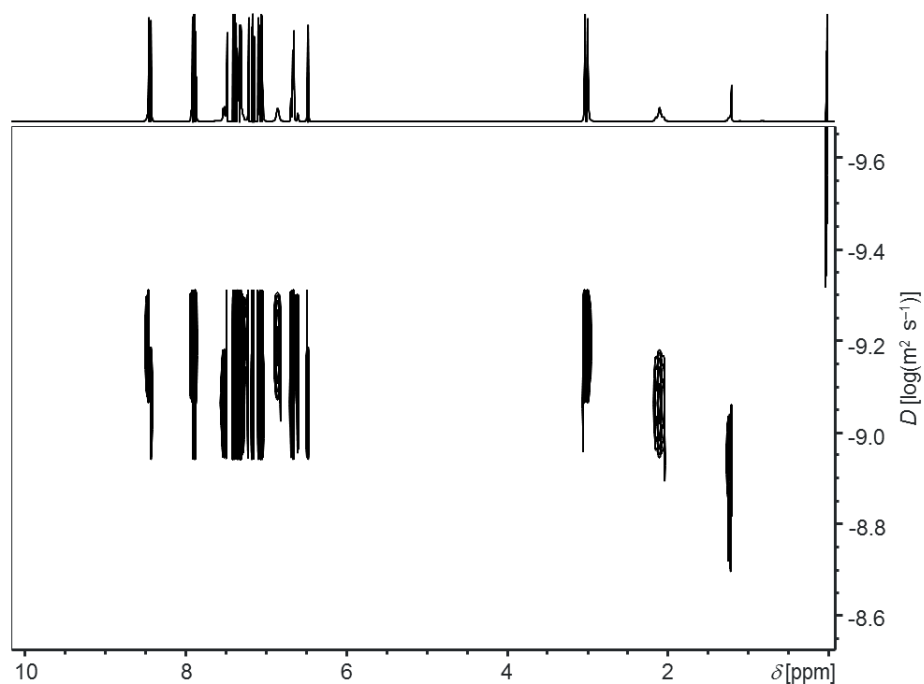

**Figure S11:**  $^1\text{H}$  2D-DOSY-NMR (500.1 MHz, in  $\text{CD}_2\text{Cl}_2/\text{CD}_3\text{CN}$  3:1 at 298 K) of a 1:1 mixture of  $[\text{Pd}(\text{dppp})]\text{OTf}_2$  and (*rac*)-**3**.

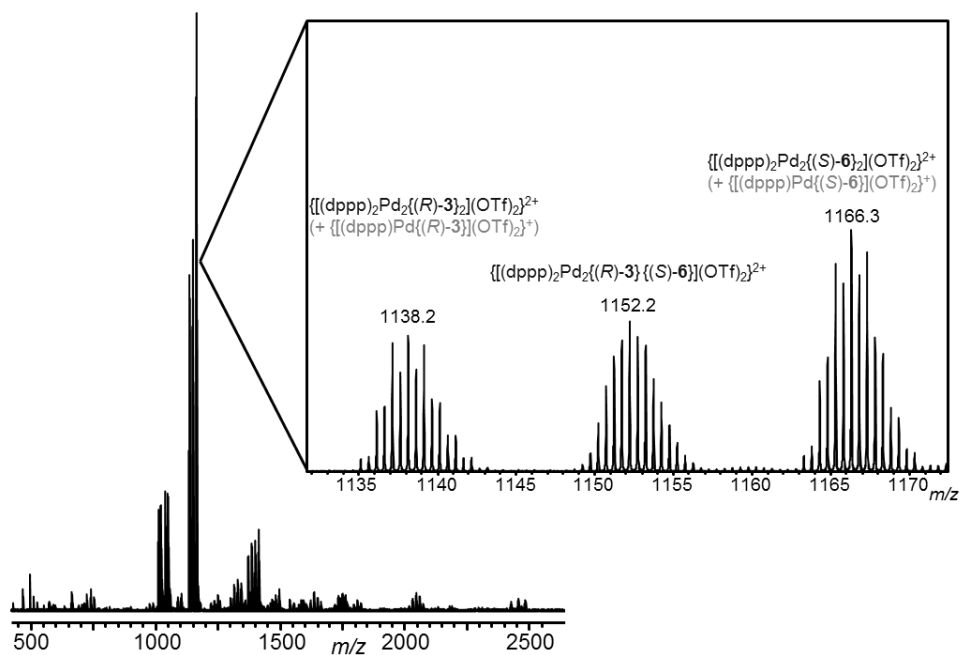

**Figure S12:** ESIMS (positive mode, sprayed from an acetonitrile solution) of a mixture of 2 equiv  $[(\text{dppp})\text{Pd}(\text{OTf})_2]$  + 1 equiv (*R*)-**3** + 1 equiv (*S*)-**6**.
